# Supplementary material for: Can statistic adjustment of OR minimize the potential confounding bias for meta-analysis of case-control study? A secondary data analysis
Source: PubMed Central journal article supplement (PMC5747180; doi:10.1186/s12874-017-0454-x), 2017-12-29
Supplement: 12874_2017_454_MOESM1_ESM.pdf [file 12874_2017_454_MOESM1_ESM.pdf]

Additional file 1: Search strategy.

| Search | Query                                                                                                                                                                                                                                                                                                                                                                                                                        |
|--------|------------------------------------------------------------------------------------------------------------------------------------------------------------------------------------------------------------------------------------------------------------------------------------------------------------------------------------------------------------------------------------------------------------------------------|
| #1     | passive[Title/Abstract]                                                                                                                                                                                                                                                                                                                                                                                                      |
| #2     | smok*[Title/Abstract]                                                                                                                                                                                                                                                                                                                                                                                                        |
| #3     | tobacco[Title/Abstract]                                                                                                                                                                                                                                                                                                                                                                                                      |
| #4     | "environmental tobacco smoke"[Title/Abstract]                                                                                                                                                                                                                                                                                                                                                                                |
| #5     | ETS[Title/Abstract]                                                                                                                                                                                                                                                                                                                                                                                                          |
| #6     | (passive[Title/Abstract]) AND smok*[Title/Abstract]                                                                                                                                                                                                                                                                                                                                                                          |
| #7     | (passive[Title/Abstract]) AND tobacco[Title/Abstract]                                                                                                                                                                                                                                                                                                                                                                        |
| #8     | ((("environmental tobacco smoke"[Title/Abstract]) OR ETS[Title/Abstract]) OR ((passive[Title/Abstract]) AND smok*[Title/Abstract])) OR ((passive[Title/Abstract]) AND tobacco[Title/Abstract])                                                                                                                                                                                                                               |
| #9     | "breast neoplasms"[MeSH Terms]                                                                                                                                                                                                                                                                                                                                                                                               |
| #10    | "breast cancer"[Title/Abstract]                                                                                                                                                                                                                                                                                                                                                                                              |
| #11    | ("breast neoplasms"[MeSH Terms]) OR "breast cancer"[Title/Abstract]                                                                                                                                                                                                                                                                                                                                                          |
| #12    | "meta-analysis"[Title/Abstract]                                                                                                                                                                                                                                                                                                                                                                                              |
| #13    | "meta-analysis"[Publication Type]                                                                                                                                                                                                                                                                                                                                                                                            |
| #14    | "meta-analysis"[MeSH Terms]                                                                                                                                                                                                                                                                                                                                                                                                  |
| #15    | ((("meta-analysis"[Title/Abstract]) OR "meta-analysis"[Publication Type]) OR "meta-analysis"[MeSH Terms])                                                                                                                                                                                                                                                                                                                    |
| #16    | overview[Title/Abstract]                                                                                                                                                                                                                                                                                                                                                                                                     |
| #17    | (((((("meta-analysis"[Title/Abstract]) OR "meta-analysis"[Publication Type]) OR "meta-analysis"[MeSH Terms])) OR overview[Title/Abstract])                                                                                                                                                                                                                                                                                   |
| #18    | (((((("meta-analysis"[Title/Abstract]) OR "meta-analysis"[Publication Type]) OR "meta-analysis"[MeSH Terms])) OR overview[Title/Abstract])) AND ((("breast neoplasms"[MeSH Terms]) OR "breast cancer"[Title/Abstract])) AND (((("environmental tobacco smoke"[Title/Abstract]) OR ETS[Title/Abstract]) OR ((passive[Title/Abstract]) AND smok*[Title/Abstract])) OR ((passive[Title/Abstract]) AND tobacco[Title/Abstract])) |
