# Supplementary material for: Can statistic adjustment of OR minimize the potential confounding bias for meta-analysis of case-control study? A secondary data analysis
Source: PubMed Central journal article supplement (PMC5747180; doi:10.1186/s12874-017-0454-x), 2017-12-29
Supplement: 12874_2017_454_MOESM2_ESM.pdf [file 12874_2017_454_MOESM2_ESM.pdf]

Additional file 2: AMSTAR score of included meta-analyses.

| Study               | Item 1 | Item 2 | Item 3 | Item 4 | Item 5 | Item 6 | Item 7 | Item 8 | Item 9 | Item 10 | Item 11 | Total |
|---------------------|--------|--------|--------|--------|--------|--------|--------|--------|--------|---------|---------|-------|
| Alina M, 2015       | 3      | 1      | 1      | 2      | 1      | 1      | 2      | 1      | 1      | 1       | 1       | 8     |
| Chen C, 2014        | 3      | 1      | 1      | 2      | 1      | 1      | 1      | 1      | 1      | 1       | 1       | 9     |
| Chen ZH, 2013       | 3      | 1      | 1      | 2      | 1      | 1      | 1      | 1      | 1      | 1       | 1       | 9     |
| Ma J, 2011          | 3      | 3      | 1      | 1      | 1      | 1      | 2      | 1      | 1      | 3       | 2       | 6     |
| Kirstin Pirie, 2008 | 1      | 2      | 1      | 2      | 1      | 1      | 2      | 1      | 2      | 2       | 1       | 6     |
| Peter NL, 2006      | 3      | 3      | 2      | 2      | 1      | 1      | 1      | 1      | 1      | 1       | 3       | 6     |
| Sadri G, 2006       | 3      | 1      | 1      | 2      | 1      | 1      | 2      | 1      | 1      | 2       | 3       | 6     |
| Johnson KC, 2005    | 3      | 3      | 2      | 1      | 1      | 1      | 2      | 1      | 1      | 1       | 3       | 6     |
| Zhou JB, 2005       | 1      | 2      | 2      | 2      | 1      | 1      | 1      | 1      | 1      | 1       | 3       | 7     |
| Khuder SA, 2001     | 3      | 1      | 1      | 2      | 1      | 1      | 2      | 1      | 1      | 1       | 3       | 7     |

\* AMSTAR: A measurement tool to assess systematic reviews.
