# Supplementary material for: Can statistic adjustment of OR minimize the potential confounding bias for meta-analysis of case-control study? A secondary data analysis
Source: PubMed Central journal article supplement (PMC5747180; doi:10.1186/s12874-017-0454-x), 2017-12-29
Supplement: 12874_2017_454_MOESM3_ESM.pdf [file 12874_2017_454_MOESM3_ESM.pdf]

Additional file 3: Summary of included original study (N=75).

1. Ahern TP, Lash TL, Egan KM, Baron JA. Lifetime tobacco smoke exposure and breast cancer incidence. *Cancer Causes Control* 2009; 20:1837-1844. doi: 10.1007/s10552-009-9376-1.
2. Alberg AJ, Daudt A, Huang HY, et al. N-acetyltransferase 2 (NAT2) genotypes, cigarette smoking, and the risk of breast cancer. *Cancer Detect Prev* 2004; 28:187-193. doi: 10.1016/j.cdp.2004.04.001.
3. Bonner MR, Nie J, Han D, et al. Secondhand smoke exposure in early life and the risk of breast cancer among never smokers (United States). *Cancer Causes Control* 2005; 16:683-689. doi: 10.1007/s10552-005-1906-x.
4. Cao KJ, Wu L, Ma GS, et al. Case-control study for breast cancer risk factor in Guangzhou. *Zhong Guo Zhong Liu* 2001; 10(12):702-4. [In Chinese].
5. Chilian-Herrera OL, Cantor KP, Hernandez-Ramirez R, Lopez-Carrillo L. Passive smoking increases the risk of breast cancer among pre- and post-menopausal Mexican women (Abstract). *Cancer Epidemiol Biomarkers Prev* 2010; 19(10 Suppl 1):A99.
6. Conlon MSC, Johnson KC, Bewick MA, et al. Smoking (active and passive), N-acetyltransferase 2, and risk of breast cancer. *Cancer Epidemiol*. 2010; 34:142–9.
7. De Silva M, Senarath U, Gunatilake M, Lokuhetty D. Prolonged breastfeeding reduces risk of breast cancer in Sri Lankan women: a case-control study. *Cancer Epidemiol*. 2010; 34:267–73.
8. Dossus L, Boutron-Ruault M-C, Kaaks R, et al. Active and passive cigarette smoking and breast cancer risk: results from the EPIC cohort. *Int J Cancer*. 2014; 134:1871–88.
9. Friedenreich CM, Bryant HE, Alexander F, Hugh J, Danyluk J, Page DL. Risk factors for benign breast biopsies: a nested case-control study in the Alberta breast screening program. *Cancer Detect Prev*. 2001; 25: 280-291.
10. Gammon MD, Eng SM, Teitelbaum SL, et al. Environmental tobacco smoke and breast cancer incidence. *Environ Res* 2004; 96:176-185. doi:

10.1016/j.envres.2003.08.009.

11. Gao CM, Ding JH, Li SP, et al. Active and passive smoking, and alcohol drinking and breast cancer risk in Chinese women. *APJCP*, 2013; 14: 993-996.
12. Hanaoka T, Yamamoto S, Sobue T, et al. Active and passive smoking and breast cancer risk in middle-aged Japanese women. *Int J Cancer*. 2005; 114: 317–22.
13. Hirayama T. Cancer mortality in nonsmoking women with smoking husbands based on a large-scale cohort study in Japan. *Prev Med*. 1984; 13: 680–90.
14. Hsieh YC, Lee CH, Tu SH, et al. CHRNA9 polymorphisms and smoking exposure synergize to increase the risk of breast cancer in Taiwan. *Carcinogenesis* 2014; 35:2520-2525. doi: 10.1093/carcin/bgu179.
15. Hu M, Han D, Sun S, et al. Bleomycin-induced mutagen sensitivity, passive smoking, and risk of breast cancer in Chinese women: a case-control study. *Cancer Causes Control* 2013; 24:629-636. doi: 10.1007/s10552-012-0137-1.
16. Ilic M, Vlajinac H, Marinkovic J. Cigarette Smoking and Breast Cancer: a Case-control Study in Serbia. *Asian Pacific Journal of Cancer Prevention*. 2013; 14:6643-6647. doi: 10.7314/apjcp.2013.14.11.6643.
17. Jee SH, Ohrr H, Kim IS. Effects of husbands' smoking on the incidence of lung cancer in Korean women. *Int J Epidemiol*. 1999; 28: 824–28.
18. Jia YP. Case-control study for female breast cancer. *Shi Yong Yi Xue Za Zhi*. 2001. 17(7):646. [in Chinese].
19. Jianchen Z, Zhenbin X, Shoufeng Z, et al. Match case-control study for detecting risk factors of breast cancer in women living in Xinxiang, Henan province. *Henan J Oncol*. 2003. 16: 201-203.
20. Johnson KC, Hu J, Mao Y, Canadian Cancer Registries Epidemiology Research G. Passive and active smoking and breast cancer risk in Canada, 1994-97. *Cancer Causes Control*. 2000; 11:211-221.
21. Johnson KC, Hu J, Mao Y. Passive and active smoking and breast cancer risk in Canada, 1994–97. The Canadian Cancer Registries Epidemiology Research Group. *Cancer Causes Control*. 2000; 11: 211–21.
22. Johnson KR, semenciw R, Hu J, Mao Y. Active and passive smoking and

- pre-menopausal breast cancer. *Am J Epidemiol.* 1998; 147:S68, 272.
23. Ju L, Liu HR, Song PD, et al. Case-control study for risk of breast cancer in college female. *Zhong Guo Xiao Yi.* 2001; 15(2):94. [In Chinese].
  24. Jun L, Hua L, Su-ying R, et al. A case-control study on environmental risk factors of female breast cancer in Tangshan city. *Chin J Public Health.* 2007; 23: 312-314.
  25. Kropp S, Chang-Claude J. Active and passive smoking and risk of breast cancer by age 50 years among German women. *Am J Epidemiol.* 2002. 156: 616–26.
  26. Lash TL, Aschengrau A. A null association between active or passive smoking and breast cancer risk. *Breast Cancer Res Treat.* 2002. 75: 181–84.
  27. Lash TL, Aschengrau A. Active and passive cigarette smoking and the occurrence of breast cancer. *Am J Epidemiol.* 1999. 149: 5-12.
  28. Li J, Liu H, Rong S, et al. [A case-control study on environmental risk factors of female breast cancer in Tangshan]. *Zhong Guo Gong Gong Wei Sheng.* 2007. 23:312-314.
  29. Liang Z, Tianfeng H, Yali J, et al. A case-control study on risk factors of breast cancer. *Chian Cancer.* 2009; 18:27-30.
  30. Lin J, Yu J. [A case-control study on risk factors of breast cancer among women in Cixi]. *Zhejiang Yu Fang Yi Xue,* 2008; 20:3-5.
  31. Lin XY, Xu GF, Xu H, et al. [Case-control study of breast cancer risk in Jinan]. *Shan Dong Da Xue Xiao Bao* 2001; 39(6):552-3.
  32. Lissowska J, Brinton LA, Zatonski W, et al. Tobacco smoking, NAT2 acetylation genotype and breast cancer risk. *Int J Cancer.* 2006. 119:1961-1969. doi: 10.1002/ijc.22044.
  33. Liu L, Wu K, Lin X, et al. Passive smoking and other factors at different periods of life and breast cancer risk in Chinese women who have never smoked—a case-control study in Chongqing, People’s Republic of China. *APJCP.* 2000.1:131-137.
  34. Liu LJ, Wu KN, Lin XN, et al. [Case-control study of breast cancer risk factor of female in Chongqing]. *Zhong Guo Zhong Liu.* 1998. 7(11):12-4.

35. Liu LJ, Wu KN, Wang JH, et al. The relationship between early life experience and risk for breast cancer in premenopausal women. *Eur J Cancer*. 1996. 32: 28-29.
36. Liu RX, Huang WM, Guo GN. [Logistic regression of female breast cancer risk factor. *Zhong Liu Fang Zhi Yan Jiu*. 1994. 21(2):102-4].
37. Luo J, Margolis KL, Wactawski-Wende J, et al. Association of active and passive smoking with risk of breast cancer among postmenopausal women: a prospective cohort study. *BMJ*. 2011; 342:d1016.
38. Marcus PM, Newman B, Millikan RC, et al. The associations of adolescent cigarette smoking, alcoholic beverage consumption, environmental tobacco smoke, and ionizing radiation with subsequent breast cancer risk (United States). *Cancer Cause Control*. 2000. 11:271-278.
39. Mechanic LE, Millikan RC, Player J, et al. Polymorphisms in nucleotide excision repair genes, smoking and breast cancer in African Americans and whites: a population-based case-control study. *Carcinogenesis*. 2006. 27:1377-1385. doi: 10.1093/carcin/bgi330.
40. Millikan RC, Pittman GS, Newman B et al. Cigarette smoking, N-acetyltransferases 1 and 2, and breast cancer risk. *Cancer Epidemiol Biomarkers Prev*. 1998. 7: 371-78.
41. Morabia A, Bernstein M, Heritier S, et al. Relation of breast cancer with passive and active exposure to tobacco smoke. *Am J Epidemiol*. 1996. 143:918-928.
42. Morabia A, Bernstein M, Heritier S, Khatchatrian N. Relation of breast cancer with passive and active exposure to tobacco smoke. *Am J Epidemiol*. 1996.143: 918-28.
43. Morabia A, Bernstein MS, Bouchardy I, Kurtz J, Morris MA. Breast cancer and active and passive smoking: the role of the N-acetyltransferase 2 genotype. *Am J Epidemiol*. 2000. 152: 226-232.
44. Nishino Y, Minami Y, Kawai M, et al. Cigarette smoking and breast cancer risk in relation to joint estrogen and progesterone receptor status: a case-control study in Japan. *Springerplus*. 2014. 3:65. doi: 10.1186/2193-1801-3-65.

45. Pimhanam C, Sangrajrang S, Ekpanyaskul C. Tobacco Smoke Exposure and Breast Cancer Risk in Thai Urban Females. *Asian Pacific Journal of Cancer Prevention*. 2014. 15:7407-7411. doi: 10.7314/apjcp.2014.15.17.7407.
46. Pirie K, Beral V, Peto R, et al. [Passive smoking and breast cancer in never smokers: prospective study and meta-analysis. *Int J Epidemiol*. 2008. 37:1069–79.
47. Ren X. A 1:1 case-control study on risk factors of breast cancer]. Dalian, Liaoning, China: Dalian Medical University. 2008.
48. Roddam AW, Pirie K, Pike MC et al. Active and passive smoking and the risk of breast cancer in women aged 36-45 years: a population based case-control study in the UK. *Br J Cancer*. 2007. 97: 434–39.
49. Rollison DE, Brownson RC, Hathcock HL, et al. Case-control study of tobacco smoke exposure and breast cancer risk in Delaware. *BMC Cancer*. 2008. 8:157. doi: 10.1186/1471-2407-8-157.
50. Rookus MA, Verloop J, de Vries F, et al. Passive and active smoking and the risk of breast cancer (Abstract (SER)). *Am J Epidemiol*. 2000. 151:S28.
51. Sagiv SK, Gaudet MM, Eng SM et al. Active and passive cigarette smoke and breast cancer survival. *Ann Epidemiol*. 2007. 17:385–93.
52. Sandler DP, Everson RB, Wilcox AJ. Passive smoking in adulthood and cancer risk. *Am J Epidemiol*. 1985. 121: 37–48.
53. Shannon J, Ray R, Wu C, et al. Food and botanical groupings and risk of breast cancer: a case-control study in Shanghai, China. *Cancer Epidemiol Biomarkers Prev*. 2005. 14:81-90.
54. Shi P, Xu M, Qian Y, et al. [Matched case—control study for detecting risk factors of breast cancer in women living in Wuxi]. *Xian Dai Yi Xue Za Zhi*. 2010. 37: 2428-2431.
55. Shrubsole MJ, Gao YT, Dai Q, et al. Passive smoking and breast cancer risk among non-smoking Chinese women. *Int J Cancer*. 2004. 110:605-609. doi: 10.1002/ijc.20168.
56. Sillanpaa P, Hirvonen A, Kataja V, et al. NAT2 slow acetylator genotype as an

- important modifier of breast cancer risk. *Int J Cancer*. 2005. 114:579-584. doi: 10.1002/ijc.20677.
57. Slattery ML, Curtin K, Giuliano AR, et al. Active and passive smoking, IL6, ESR1, and breast cancer risk. *Breast Cancer Res Treat*. 2008. 109:101–11.
  58. Smith SJ, Deacon JM, Chilvers CE. Alcohol, smoking, passive smoking and caffeine in relation to breast cancer risk in young women. UK National Case-Control Study Group. *Br J Cancer*. 1994. 70: 112–9.
  59. Tan H, Liu A, Wang J, et al. [A case control study on multiple risk factors of female breast cancer]. *Hunan Yi Ke Da Xue Xue Bao*. 1998. 23:38-41.
  60. Tang LY, Chen LJ, Qi ML, et al. Effects of passive smoking on breast cancer risk in pre/post-menopausal women as modified by polymorphisms of PARP1 and ESR1. *Gene*. 2013. 524:84-89. doi: 10.1016/j.gene.2013.04.064.
  61. Tong JH, Li Z, Shi J, et al. Passive smoking exposure from partners as a risk factor for ER+/PR+ double positive breast cancer in never-smoking Chinese urban women: a hospital-based matched case control study. *PLoS One*. 2014. 9:e97498. doi: 10.1371/journal.pone.0097498.
  62. Wang P, Xie S, Zhang C, et al. [Relationship of passive smoking and N-acetyltransferase 2 polymorphisms with breast cancer susceptibility]. *Zhong Guo Xian Dai Yi Xue Za Zhi*. 2011. 21: 3271- 3275.
  63. Wang X, Chen W, Lei T, et al. [A case-control study on risk factors of female breast cancer in rural area of Cixi city, Zhejiang province]. *Zhong Guo Zhong Liu*. 2006. 15: 294-297.
  64. Wang Y. [Case-control study on the risk factors of breast cancer based on a cohort population in Jiashan country]. Hangzhou, Zhejiang, China: Zhejiang University; 2006. [In Chinese].
  65. Warenberg D, Calle EE, Thun MJ, et al. Passive smoking exposure and female breast cancer mortality. *J Natl Cancer Inst*. 2000. 92: 1666-1673.
  66. Yingqing W. Case-control study on the risk factors of breast cancer in Jiashan county [Unpublished dissertation]. Zhejiang, China: Zhejiang University. 2007.
  67. Young E, Leatherdale S, Sloan M, et al. Age of smoking initiation and risk of

- breast cancer in a sample of Ontario women. *Tob Induc Dis*. 2009. 5:4.
68. Yu SC, Wang TJ, Zhang B. Case-control study of female breast cancer in Shenyang. *Zhong Guo Gong Gong Wei Sheng Xue Bao*. 1991. 10(1):7-9. [In Chinese].
  69. Yuanping Z. A case-control study of risk factors of breast cancer. *J Pract Med*. 2001.17: 646.
  70. Zang S, Zhang Y. [Analysis of 312 cases of breast cancer risk factors]. *Shi Yong Yi Yao Za Zhi*. 2011. 1078-1079.
  71. Zha Y. [Case-control study on the risk factors of female breast cancer]. *Shi Yong Yi Xue Za Zhi*. 2001. 646.
  72. Zhang CX, Ho SC, Chen YM, et al. Meat and egg consumption and risk of breast cancer among Chinese women. *Cancer Causes Control*. 2009. 20:1845-1853. doi: 10.1007/s10552-009-9377-0.
  73. Zhao Y, Shi Z, Liu L. [Matched case-control study for detecting risk factors of breast cancer in women living in Chengdu]. *Zhonghua Liu Xing Bing Xue Za Zhi*. 1999. 20: 91-4.
  74. Zhu HH, Gao YT, Blair A, et al. Secondhand smoke and breast cancer risk: a community-based prospective cohort study (Abstract (SER)). *Am J Epidemiol*. 2006. 163:S98.
  75. Zhu M, Tong J, Zhang ZY, et al. [Analysis of breast cancer risk factor]. *Zhong Guo Gong Gong Wei Sheng*. 2000. 16(3):251.
